# Supplementary material for: The first vanadium-catalyzed oxidation of aryl allylic selenides with in situ [2,3] sigmatropic rearrangement
Source: Royal Society of Chemistry journal article supplement (doi:10.1039/b006278m), 2000-01-01
Supplement: b006278m.doc [file b006278m.doc]

**The first vanadium-catalyzed oxidation of aryl allylic selenides with *in-situ* [2+3] sigmatropic rearrangement**

**Rich G. Carter* and T. Campbell Bourland**

*Department of Chemistry and Biochemistry, University of Mississippi, Oxford, MS 38677*

_____________________________________________________________________________

**Electronic Supplementary Information**

_____________________________________________________________________________

**Typical experimental procedure for synthesis of selenides 1 and 5:** To a stirred solution of the alcohol in THF (0.3 M) was added *o*-nitrophenyl selenocyanate (1.2 equiv.) followed by PBu3 (1.1 equiv.) dropwise over 5 minutes. After 4 - 12 h, the reaction was quenched with aqueous NaOH (1 M) and extracted with EtOAc (3 X). The dried (MgSO4) extract was concentrated *in vacuo* and purified.

**1a**: Purified by column chromatography over silica gel, eluting with 5 - 20% EtOAc / hexanes, to give **1a** (86%): IR (neat) 2924, 1504, 1130, 728, cm-1; 1H NMR (300 MHz, CDCl3) 8.29 (d of d, J = 1.1, 7.6 Hz, 1H), 7.50 - 7.56 (m, 2H), 7.27 - 7.34 (m, 1H), 5.78 (d of t, J = 7.2, 15.1 Hz, 1 H), 5.57 (d of t, J = 7.6, 15.1 Hz, 1 H), 3.58 (d, J = 7.2 Hz, 2H), 1.99 - 2.06 (m, 2H), 1.24 - 1.35 (m, 8H),0.87 (t, J = 6.9 Hz, 3H); 13 C NMR (75 MHz, CDCl3) 146.9, 136.5, 134.4, 133.7, 129.6, 126.5, 125.6, 123.5, 32.6, 31.9, 29.3, 29.0, 28.9, 22.8, 14.3.

**1b**: Purified by column chromatography over silica gel, eluting with 5 - 20% EtOAc / hexanes, to give **1b** (75%): IR (neat) 2922, 2849, 1590, 1565, 1504; 1H NMR (300 MHz, CDCl3) 8.29 (d of d, J = 1.1, 8.5 Hz, 1H), 7.49 - 7.55 (m, 2H), 7.28 - 7.33 (m, 1H), 5.70 (d of d, J = 6.8, 15.2 Hz, 1 H), 5.52 (d of t, J = 7.3, 15.2 Hz, 1 H), 3.57 (d, J = 7.3 Hz, 2H), 1.94 - 1.97 (m, 1H), 1.58 - 1.73 (m, 4H), 1.01 - 1.27 (m, 6H); 13 C NMR (75 MHz, CDCl3) 146.9, 142.2, 134.3, 133.6, 129.8, 126.5, 121.0, 40.8, 33.4, 32.9, 29.1, 26.3, 26.1.

**1c** Purified by column chromatography over silica gel, eluting with 5 - 20% EtOAc / hexanes, to give **1c** (92%): IR (neat) 2900, 2845, 1513, 1330, 729 cm-1; 1H NMR (300 MHz, CDCl3) 8.29 (d of d, J = 1.1, 6.9 Hz, 1H), 7.49 - 7.54 (m, 2H), 7.33 (d of d, J = 6.9, 8.0 Hz, 1H), 5.62 (d, J = 15.5 Hz, 1 H),5.41 (d of t, J = 7.2, 15.5 Hz, 1 H), 3.59 (d, J = 7.2 Hz, 2H), 1.97 (bs, 3H)1.54 - 1.73 (m, 12H); 13 C NMR (75 MHz, CDCl3) 147.7, 146.9, 134.3, 133.6, 129.8, 126.4, 125.6, 118.4, 42.2, 36.9, 35.2, 29.4, 28.5.

**1d:** Purified by chromatography over silica gel, eluting with 5 - 30 % EtOAc / petroleum ether, to give **1d** (85%): IR (neat) 2940, 1596, 1506; 1H NMR (300 MHz, CDCl3) 8.28 (d of d, J = 0.9, 8.3 Hz, 1H), 7.50 - 7.61 (m, 2H), 7.27 - 7.35 (m, 3H) 6.87 (d, J = 7.4 Hz, 2H), 6.61 (d, J = 15.7 Hz, 1H), 6.20 (d of t, J = 7.5, 15.7 Hz, 1H), 3.81 (s, 3H), 3.79 (d, J = 7.5 Hz, 2H); 3C NMR (75 MHz, CDCl3)  159.6, 146.9, 134.2, 134.0, 133.9, 129.6, 129.4, 127.8, 126.6, 125.8, 121.1, 114.2, 55.5, 29.4.

**1e:** Purified by chromatography over silica gel, eluting with 5 - 10 % EtOAc / petroleum ether, to give **1e** (66%): IR (neat) 2982, 1562, 1507 cm-1; 1H NMR (300 MHz, CDCl3) 8.28 (d of d, J = 1.0, 8.1 Hz, 1H), 7.64 (d, 8.1 Hz, 1H), 7.53 (d of d of d, J = 1.0, 7.3, 7.9 Hz, 1H), 7.21 - 7.37 (m, 6H), 6.64 (s, 1H), 3.82 (s, 2H), 2.07 (s, 3H); 13C NMR (75 MHz, CDCl3)  147.2, 137.5, 134.3, 133.7, 132.9, 129.9, 129.8, 129.0, 128.4, 126.9, 126.5, 125.8, 37.8, 18.3.

**1f:** Purified by chromatography over silica gel, eluting with 10 -20 % EtOAc / hexanes, to give **1e** (81%): IR (neat) 2919, 1560, 1503 cm-1; 1H NMR (300 MHz, CDCl3) 8.28 (d of d, J = 1.0, 8.1 Hz, 1H), 7.48 - 7.51 (m, 2H), 7.09 - 7.35 (m, 6H), 5.71 (d of d, J = 6.7, 15.1 Hz, 1H), 5.49 (d of t, J = 7.3 Hz, 15.1 Hz), 3.55 (d, J = 7.3 Hz), 2.42 - 2.65 (m, 3H), 0.97 (d, J = 6.2 Hz, 3H); 13C NMR (75 MHz, CDCl3)  141.1, 140.5, 134.3, 133.6, 129.6, 129.4, 128.3, 126.5, 126.1, 125.6, 122.3, 43.5, 38.6, 28.7, 20.0.

**Typical experimental for synthesis of rearranged alcohols 4 and 6:** To a stirred solution of the selenide in CH2Cl2 (0.3 M) with powdered 4Å molecular sieves (1g per mmol) was added VO(acac)2 (10 mol %). After 10 -15 min, the green solution was cooled to -10°C in an ice / acetone bath and cumene hydrogen peroxide (1.8 equiv.) was added. After 30 min, the deep red solution was quenched with PBu3 (1.2 equiv.). After an additional 5 min, saturated aqueous NH4Cl was added and extracted with Et2O (3 X). The dried (MgSO4) extract was concentrated *in vacuo* and purified.

**4a:** Purified by column chromatography over silica gel, eluting with 0.5% - 1% MeOH / CH2Cl2 , to give **4a** (70%):IR (neat) 3351, 2928, 2857, 1644; 1H NMR (300 MHz, CDCl3) 5.87 (d of d of d, J = 6.3, 10.5, 17.2 Hz, 1H), 5.21 (d of d, J =, 1.4, 17.2 Hz, 1H), 5.10 (d of d, J =, 1.4, 10.5 Hz, 1H)4.08 - 4.10 (m, 1H),1.25 - 1.63 (m, 10H),0.88 (t, J = 6.8 Hz, 3H); 13 C NMR (75 MHz, CDCl3) 141.5, 114.7, 73.5, 37.2, 31.9, 29.4, 25.4, 22.8, 14.2.

**4b:** Purified by column chromatography over silica gel, eluting with 0.5% - 1% MeOH / CH2Cl2, to give **4b** (75%):IR (neat)3398, 2924, 2852, 1643; 1H NMR (300 MHz, CDCl3) 5.85 (d of d of d, J = 6.4, 10.4, 17.1 Hz, 1H), 5.20 (d of d, J = 1.6, 17.1 Hz, 1H), 5.14 (d of d, J = 1.6, 10.4 Hz, 1H), 3.80 (d of d, J = 6.3, 6.4 Hz, 1H),1.60 - 1.95 (m, 5H), 0.96 - 1.50 (m, 6H); 13 C NMR (75 MHz, CDCl3) 139.9, 115.7, 43.6, 28.9, 28.5, 26.7, 26.2.

**4c** Purified by column chromatography over silica gel, eluting with 2-20% EtOAc / hexanes, to give **4c** (84%): IR (neat) 3368, 2902, 2847 cm-1; 1H NMR (300 MHz, CDCl3) 5.94 (d of d of d, J = 6.9, 10.9, 17.4 Hz, 1H), 5.17 - 5.23 (m, 2H), 3.57 (d, J = 6.9 Hz, 1H), 1.98 (bs, 3H), 1.40-1.90 (m, 12H); 13 C NMR (75 MHz, CDCl3) 139.1, 116.7, 81.7, 38.2, 37.3, 37.0, 28.5.

**4d:** Purified by chromatography over silica gel, eluting with 2 - 25 % Et2O / pentane, to give **4e** (66%): IR (neat) 3400, 3076, 3003, 2956, 1610, 1513 cm-1; 1H NMR (300 MHz, CDCl3)  7.29 (d, J = 6.8 Hz, 2H), 6.89 (d, J = 6.8 Hz, 2H), 6.04 (d of d of d, J = 5.6, 10.3, 17.0 Hz), 5.33 (d of d, J = 1.1, 17.0 Hz, 1H), 5.15 - 5.21 (m, 2H), 3.80 (s, 3H), 2.16 (bs, 1H); 13C NMR (75 MHz, CDCl3)  159.4, 140.6, 135.1, 127.9, 115.0, 114.1, 75.1, 55.5.

**4e**: Purified by chromatography over silica gel, eluting with 2 - 15 % Et2O / petroleum ether, to give **4e** (70%): IR (neat) 3383, 2972, 1651, 1492, 1450 cm-1; 1H NMR (300 MHz, CDCl3)  7.26 - 7.40 (m, 5H), 5.22 (s, 1H), 5.13 (s, 1H), 4.97 (s, 1H), 2.15 - 2.25 (bs, 1H) 1.62 (s, 3H); 13C NMR (75 MHz, CDCl3)  147.0, 142.2, 128.6, 127.9, 126.7, 111.4, 78.0, 18.5.

**4f:** Purified by chromatography over silica gel, eluting with 2 - 20 % Et2O / pentane, to give **4f** (60%): IR (neat) 3386, 3082, 3025, 2962, 2927, 1602; 1H NMR (300 MHz, CDCl3) 7.17 - 7.31 (m, 5H), 5.86 - 5.93 (m, 1H),5.17 - 5.30 (m, 2H), 4.06 (bs, 1H of a diastereomer), 3.99 (bs, 1H of a diastereomer),2.84 - 2.92 (m, 1H),2.33 - 2.44 (m, 1H),1.91 - 1.94 (m, 1H), 1.75 (bs, 1H), 0.87 (d, J = 6.9 Hz, 3H of a diastereomer), 0.84 (d, J = 6.9 Hz, 3H of a diastereomer); 13 C NMR (75 MHz, CDCl3) 141.2, 141.0, 139.9, 139.2, 129.5, 129.4, 128.5, 128.4, 126.1, 116.5, 115.5, 77.6, 75.7, 40.84, 40.80, 39.4, 38.9, 29.9, 15.0, 14.0.

**5a** Purified by column chromatography over silica gel, eluting with 5-20% EtOAc / hexanes, to give **5a** (86%): IR 2924, 1504, 1130, 728, cm-1; 1H NMR (300 MHz, CDCl3) 8.29 (d, J = 8.1 Hz, 1H), 7.50 - 7.56 (m, 2H), 7.27 - 7.34 (m, 1H),5.57 - 5.69 (m, 2H), 3.64 (d, J = 6.8 Hz, 2H), 2.13 - 2.20 (m, 2H), 1.29 - 1.45 (m, 8 H), 0.89 (t, J = 6.9 Hz, 3H); 13 C NMR (75 MHz, CDCl3); 146.7, 135.9, 135.0, 133.8, 129.5, 126.5, 125.5, 122.5, 31.9, 29.6, 29.2, 27.5, 23.8, 22.8, 14.3.

**5b:** Purified by chromatography over silica gel, eluting with 2 - 20 % EtOAc / petroleum ether, to give **1d** (70%): IR (neat) 3079, 3056, 2927, 1589, 1565, 1513 cm-1; 1H NMR (300 MHz, CDCl3) 8.30 (d of d, J = 1.6, 8.1 Hz, 1H), 7.24 - 7.41 (m, 8H), 6.64 (d, J = 11.5 Hz, 1H), 6.20 (d of t, J = 8.0, 11.5 Hz, 1H), 3.86 (d, J = 8.0 Hz, 2H); 3C NMR (75 MHz, CDCl3)  146.7, 136.5, 133.9, 133.8, 133.3, 129.6, 129.0, 128.8, 127.7, 126.6, 125.8, 125.7, 25.0.

**5c** Purified by column chromatography over silica gel, eluting with 2 - 20% EtOAc / hexanes, to give **5c** (60%): IR (neat) 3024, 2957, 2923, 1589, 1565, 1512 cm-1; 1H NMR (300 MHz, CDCl3) 8.29 (d, J = 8.1Hz, 1H), 7.48 (d of d, J = 6.8, 7.8 Hz, 1H), 7.15 - 7.40 (m, 7 H), 5.43 - 5.57 (m, 2H), 3.41 (d of d, J = 7.3, 10.8 Hz, 1H), 3.26 (d of d, J = 6.2, 10.8 Hz, 1H), 2.79 - 2.87 (m, 1H), 2.54 - 2.74 (m, 2H), 1.07 (d, J = 6.7 Hz, 3Hz); 13 C NMR (75 MHz, CDCl3) 146.2, 140.6, 134.9, 133.8, 129.5, 129.4, 128.6, 128.4, 126.6, 126.3, 125.5, 121.8, 43.8, 24.7, 23.7, 21.1.

**6a** purified by column chromatography over silica gel, eluting with 0.5%-1% MeOH / CH2Cl2, to give **6a** (89%): IR (neat) 3351, 2928, 2857, 1644; 1H NMR (300 MHz, CDCl3) 5.87 (d of d of d, J = 6.3, 10.5, 17.2 Hz, 1H), 5.21 (d of d, J = 1.4, 17.2 Hz, 1H), 5.10 (d of d, J =, 1.4, 10.5 Hz, 1H)4.08 - 4.10 (m, 1H),1.25 - 1.63 (m, 10H),0.88 (t, J = 6.8 Hz, 3H); 13 C NMR (75 MHz, CDCl3) 141.5, 114.7, 73.5, 37.2, 31.9, 29.4, 25.4, 22.8, 14.2.

**6b:** Purified by chromatography over silica gel, eluting with 2 - 15 % Et2O / petroleum ether, to give **6b** (70%): IR (neat) 3364, 3071, 2862, 1501 cm-1; 1H NMR (300 MHz, CDCl3)  7.26 - 7.43 (m, 5H), 6.06 (d of d of d, J = 6.0, 10.3, 17.0 Hz, 1H), 5. 36 (d, J = 17.0 Hz, 1H), 5.19 - 5.23 (m, 2H), 2.16 (bs, 1H); 13C NMR (75 MHz, CDCl3)  142.8, 140.4, 128.7, 128.0, 126.5, 115.3, 75.6.

**6c** Purified by column chromatography over silica gel, eluting with 2-20% EtOAc / hexanes, to give **6c** (71%): IR (neat) 3386, 3082, 3025, 2962, 2927, 1602; 1H NMR (300 MHz, CDCl3) 7.17 - 7.31 (m, 5H), 5.86 - 5.93 (m, 1H),5.17 - 5.30 (m, 2H), 4.06 (bs, 1H of a diastereomer), 3.99 (bs, 1H of a diastereomer),2.84 - 2.92 (m, 1H),2.33 - 2.44 (m, 1H),1.91 - 1.94 (m, 1H), 1.75 (bs, 1H), 0.87 (d, J = 6.9 Hz, 3H of a diastereomer), 0.84 (d, J = 6.9 Hz, 3H of a diastereomer); 13 C NMR (75 MHz, CDCl3) 141.2, 141.0, 139.9, 139.2, 129.5, 129.4, 128.5, 128.4, 126.1, 116.5, 115.5, 77.6, 75.7, 40.84, 40.80, 39.4, 38.9, 29.9, 15.0, 14.0.
